# Supplementary material for: Molecular simulation, characteristics and mechanism of thermal-responsive acetylated amylose V-type helical complexes
Source: Royal Society of Chemistry journal article supplement (doi:10.1039/d1tb00102g), 2021-01-01
Supplement: d1tb00102g1.pdf [file d1tb00102g1.pdf]

## Electronic Supplementary Information (ESI)

### Molecular simulation, characteristic and mechanism of thermal-responsive acetylated amylose V-type helical complex

*Peng Tang<sup>a</sup>, Yongchun Liu<sup>b</sup>, Yuan Gao<sup>c</sup>, Ya Wang<sup>a</sup>, Hui Zhang<sup>a</sup>, Yiming Liu<sup>a</sup>, Daocheng Wu<sup>a\*</sup>*

*a* Key Laboratory of Biomedical Information Engineering of the Ministry of Education, School of Life Science and Technology, Xi'an Jiaotong University, Xi'an 710049, PR China

*b* Key Laboratory of Applied Surface and Colloid Chemistry, Ministry of Education, School of Chemistry and Chemical Engineering, Shaanxi Normal University, Xi'an, 710119 China

*c* Department of Anesthesiology, The First Affiliated Hospital of Xi'an Jiaotong University, Xi'an, 710061, PR China

\* Corresponding authors. E-mail addresses: [wudaocheng@mail.xjtu.edu.cn](mailto:wudaocheng@mail.xjtu.edu.cn), Tel: 0086-29-82663941, Fax: 0086-29-82663941

# 1. Supporting methods

## 1.1. Materials

High amylose from corn, 1-methylimidazole, propofol and hexane were purchased from Aladdin Co., Ltd. (Shanghai, China). Iodine was purchased from Tianjin Kemiou Chemical Reagent Co., Ltd. acetic anhydride was purchased from Sigma-Aldrich Trading Co., Ltd. (Shanghai, China).

## 1.2. The synthesis of acetylated amylose

The synthesis of acetylated amylose was according with literature early reported.<sup>S1</sup> Briefly, 2.0 g amylose dissolved in 100 mL DMSO at 0 °C for 30 min, then 195  $\mu$ L of acetic anhydride and 164  $\mu$ L of 1-methylimidazole were added. The reaction continued at 80 °C for 4 h. Finally, a large volume of ethanol was added into above reaction mixture and acetylated amylose was precipitated. The precipitate was centrifuged and washed twice with ethanol, and then dried at 50 °C to obtain acetylated amylose powder.

## 1.3. The preparation of acetylated amylose-guest V-type helical complex

100 mg acetylated amylose was dissolved in 20 mL pure water, then about 20 mg iodine, 20  $\mu$ L propofol, 20  $\mu$ L hexane or 20  $\mu$ L 7-hydroxycoumarin solution (5 mg/mL) was added above solution, and then the mixture was stirred overnight. Finally, the complex solution was obtained by filtration using a 0.22 $\mu$ m filter.

# 2. Supporting data

**Table S1.** Structure parameters of acetylated amylose-guest V-type helix complex

| Guest type    | blank             | iodine            | propofol          | hexane            |
|---------------|-------------------|-------------------|-------------------|-------------------|
| Guest number  | --                | 14                | 4                 | 5                 |
| Diameter (nm) | 1.477 $\pm$ 0.064 | 1.248 $\pm$ 0.034 | 1.211 $\pm$ 0.064 | 1.338 $\pm$ 0.077 |
| Pitch (nm)    | 0.847 $\pm$ 0.026 | 0.869 $\pm$ 0.042 | 0.844 $\pm$ 0.024 | 0.841 $\pm$ 0.014 |

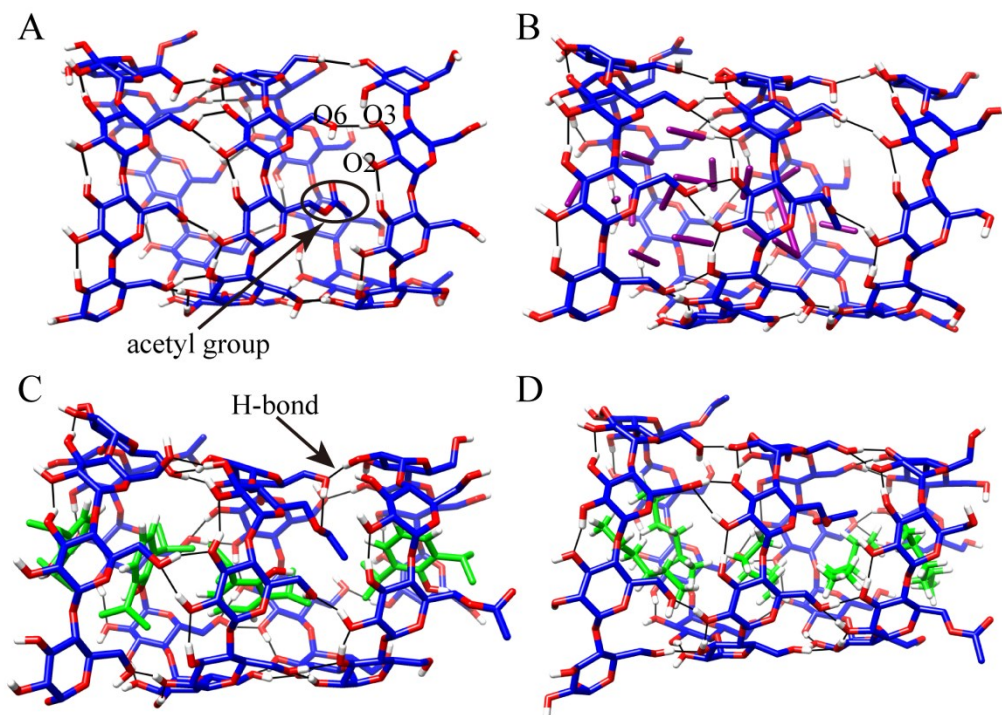

**Fig. S1** Molecular structures of acetylated amylose V-type helical complexes. (A) Blank acetylated amylose helix; (B) acetylated amylose-iodine V-type helix complex; (C) acetylated amylose-propofol helix complex; (D) acetylated amylose-hexane helix complex.

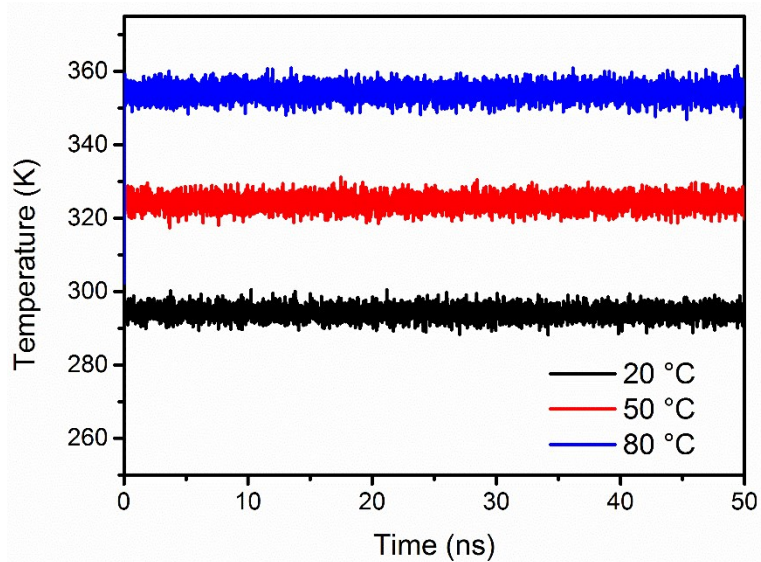

**Fig. S2** The temperature fluctuation during molecular dynamic simulation.

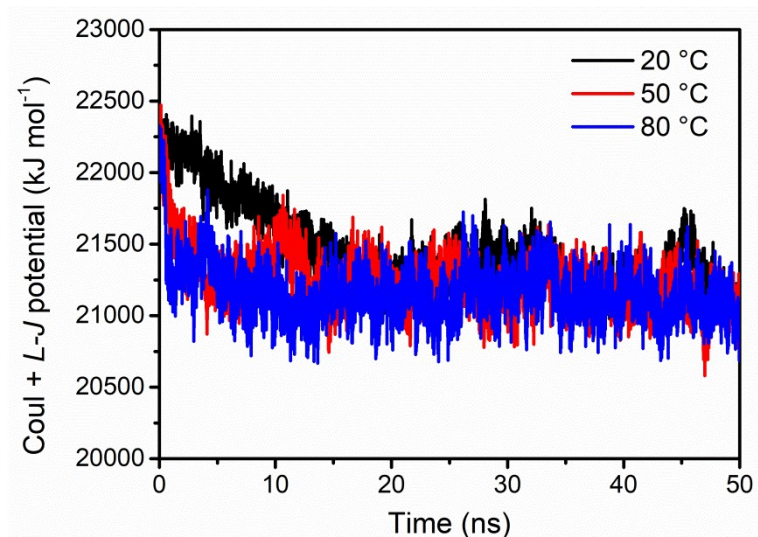

**Fig. S3** The energy fluctuation (The sum of coulomb and  $L$ - $J$  potential) of acetylated amylose during molecular dynamic simulation.

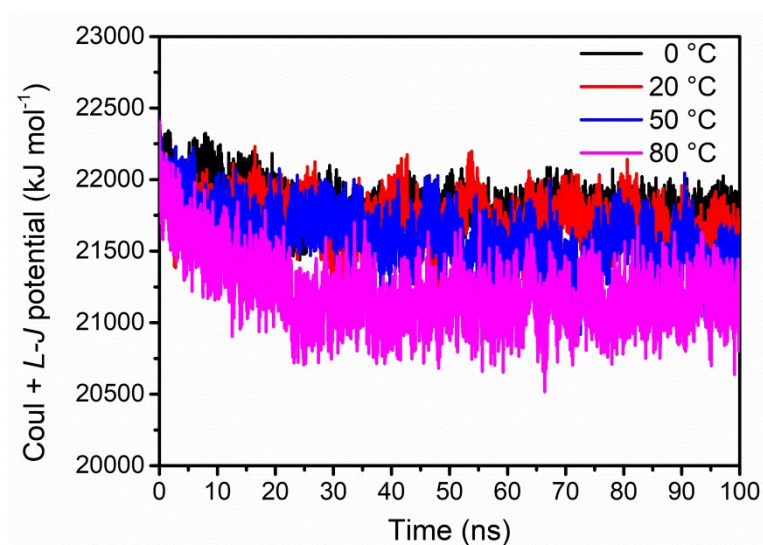

**Fig. S4** Energy fluctuation of acetylated amylose in AAIHC during molecular dynamic simulation.

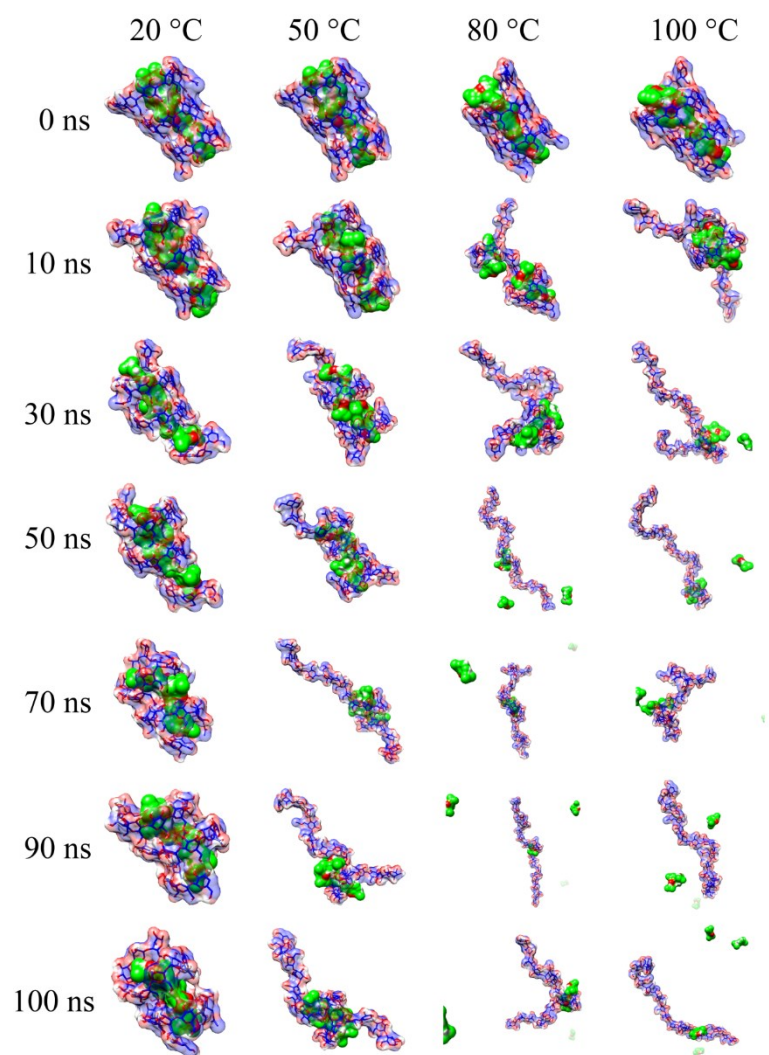

**Fig. S5** Thermal-responding unfolding and releasing snapshots of AAPHc at different time-points.

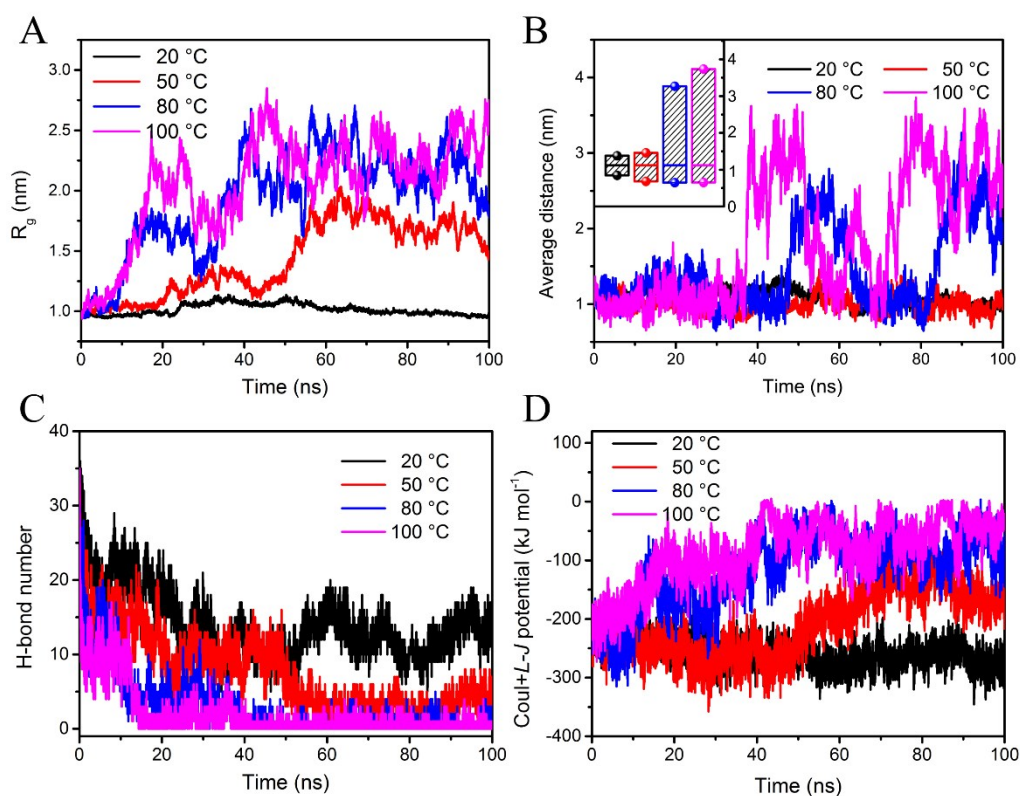

**Fig. S6** Thermal-responsive helix-unfolding and guest-release characteristics in AAPHC. (A) The  $R_g$  of acetylated amylose in helix complex at different temperatures. (B) The average distance between propofol molecules and the center atom of acetylated amylose at different temperatures (inserted data is the maximum and minimum average distance at different temperatures). (C) The H-bond number of acetylated amylose-propofol V-type complex at different temperatures. (D) The binding energy between propofol molecules and acetylated amylose.

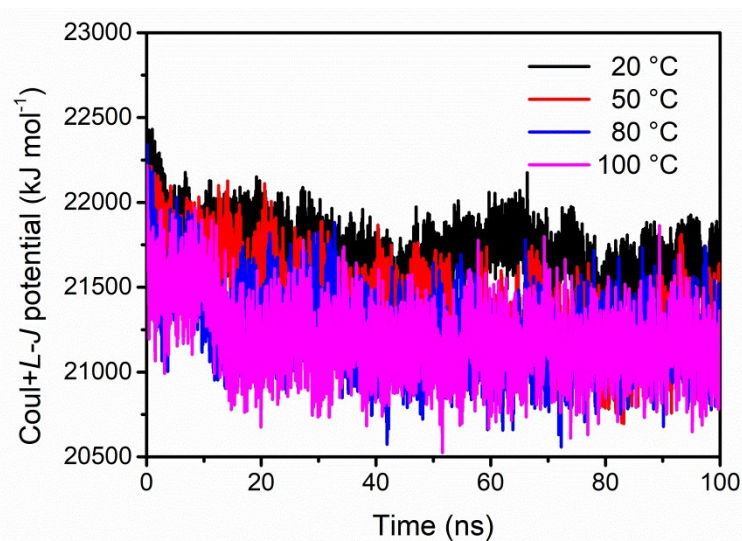

**Fig. S7** Energy fluctuation of acetylated amylose in AAPHC during molecular dynamic simulation.

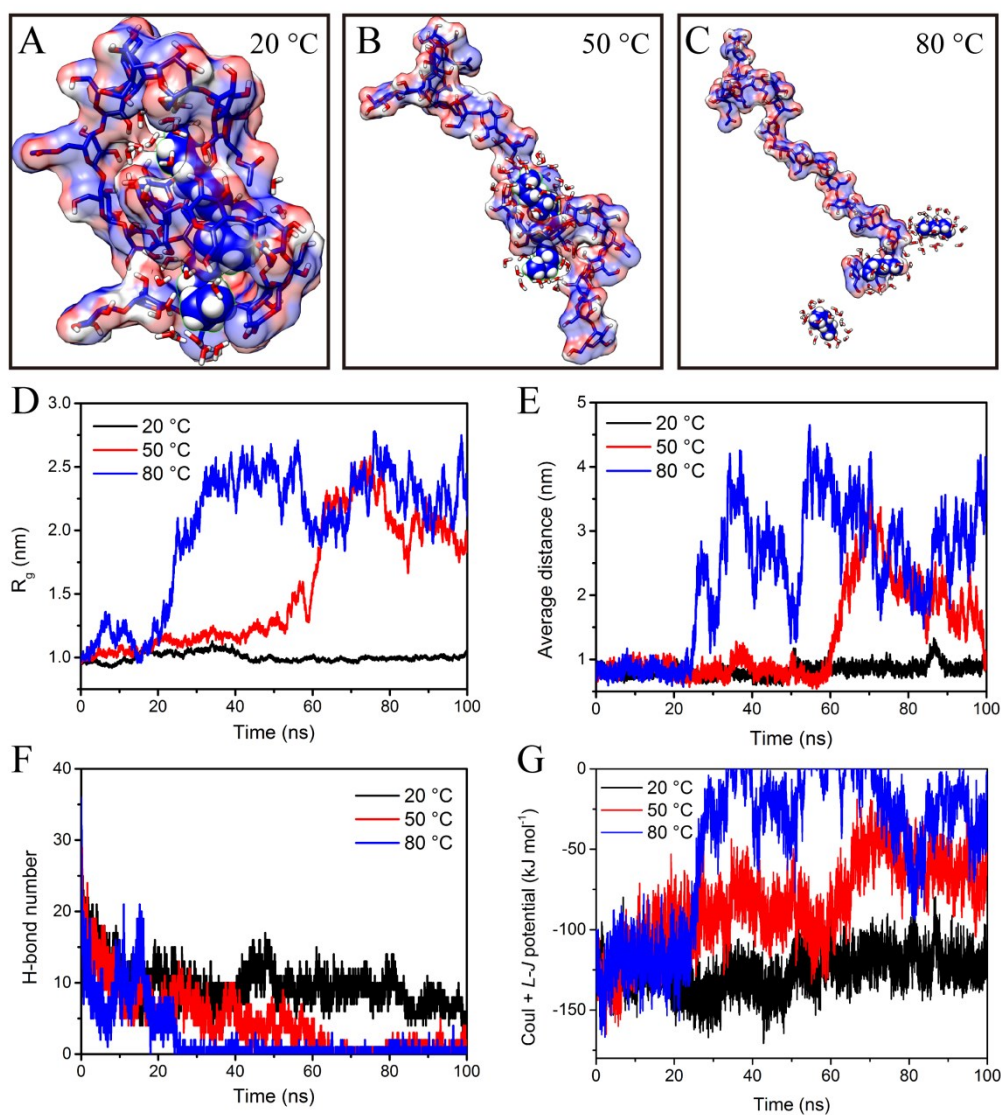

**Fig. S8** Thermal-responsive helix-unfolding and guest-release characteristics in AAHHC. (A) The  $R_g$  value of AAHHC at different temperature. (B) The average distance between hexane molecules and the center atom of acetylated amylose at different temperature (inserted data is the maximum and minimum average distance at different temperature). (C) The H-bond number of AAHHC at different temperature. (D) The binding energy between hexane molecules and acetylated amylose.

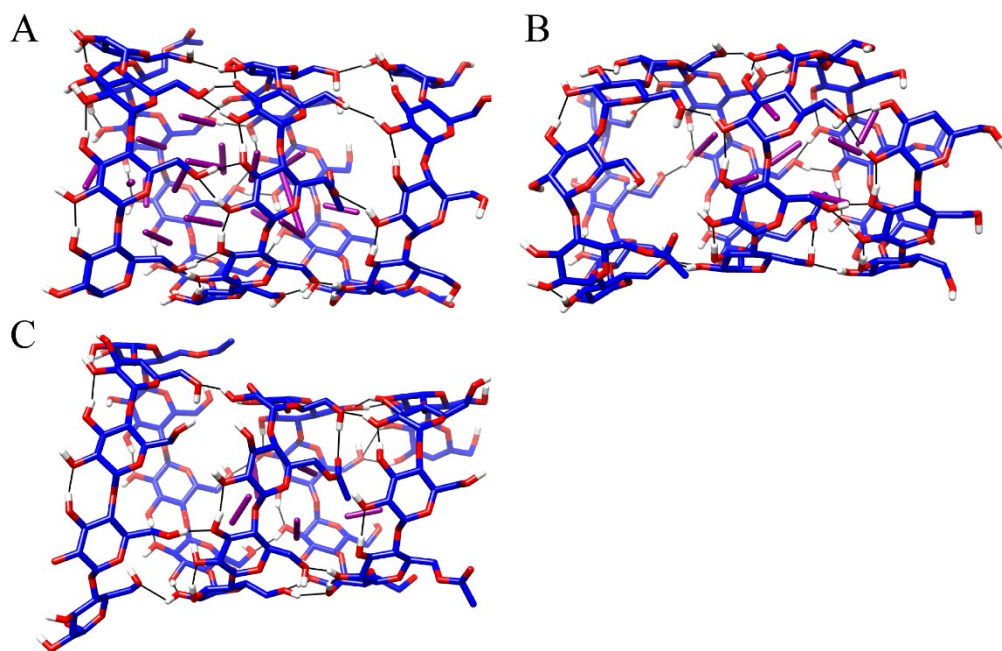

**Fig. S9** Molecular structures of AAIHC with different iodine loaded. (A) 14; (B) 7; (C) 5.

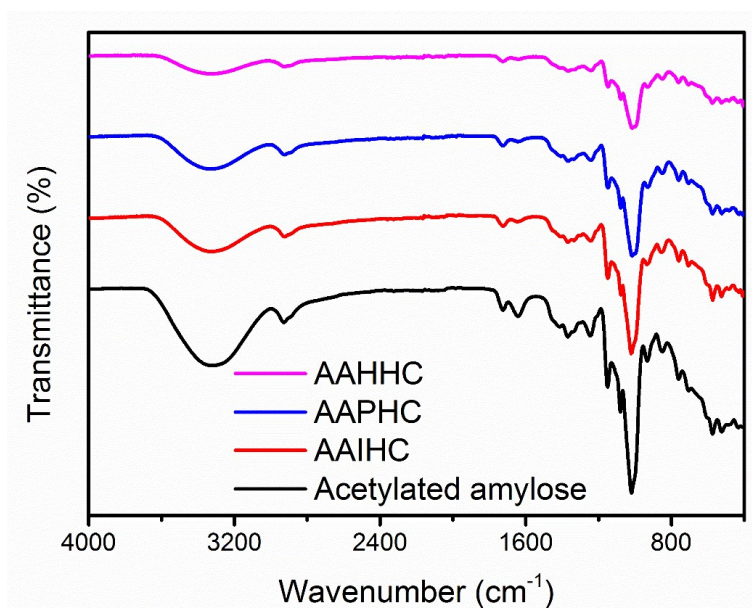

**Fig. S10** The FT-IR spectra of AAGHCs.



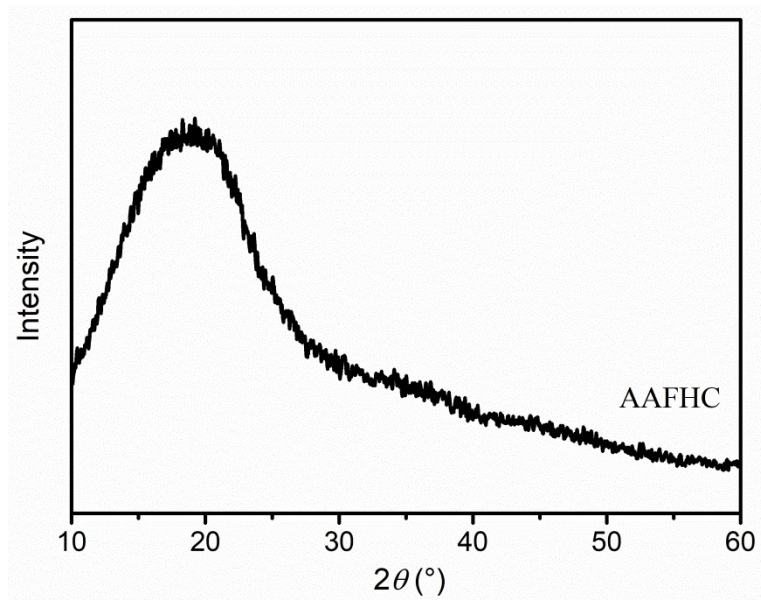

**Fig. S11** The XRD pattern of AAFHC.

### 3. Appendix

#### 1. The pdb and itp file of iodine

##### Pdb file:

```
ATOM      1  I1  IODI      1      -4.854   0.729   0.000   1.00   0.00   I
ATOM      2  I2  IODI      1      -2.194   0.729   0.000   1.00   0.00   I
```

##### Itp file:

```
[ moleculetype ]
```

```
;name nrexcl
```

```
IODI 1
```

```
[ atoms ]
```

```
;nr typeresnr residu atom cgnr charge mass
```

```
1 I 1 IODI I1 1 0.000 126.9040
```

```
2 I 1 IODI I2 2 0.000 126.9040
```

```
[ bonds ]
```

```
; ai aj fu b0 kb, b0 kb
```

```
1 2 1 0.20600 111409.9 0.20600 111409.9
```

```
[ exclusions ]
```

```
1 2
```

#### 2. The pdb and itp file of pro

##### Pdb file:

```
HEADER UNCLASSIFIED
```

```
22-May-19
```

```
TITLE UNITED ATOM STRUCTURE FOR MOLECULE UNL
```

```
AUTHOR GROMOS AUTOMATIC TOPOLOGY BUILDER REVISION 2019-05-15 09:44:25
```

```
AUTHOR 2 http://compbio.biosci.uq.edu.au/atb
```

```
HETATM 1 C11 Pro 0 2.963 -1.185 -1.103 1.00 0.00
```

```
C
```

```
HETATM 2 C9 Pro 0 2.566 -0.525 0.237 1.00 0.00
```

```
C
```

```
HETATM 3 C10 Pro 0 3.721 0.332 0.778 1.00 0.00
```

```
C
```

```
HETATM 4 C8 Pro 0 1.242 0.227 0.101 1.00 0.00
```

```
C
```

```
HETATM 5 C7 Pro 0 0.017 -0.476 0.132 1.00 0.00
```

```
C
```

```
HETATM 6 O1 Pro 0 -0.023 -1.843 0.304 1.00 0.00
```

```
O
```

```
HETATM 7 H11 Pro 0 0.872 -2.178 0.464 1.00 0.00
```

```

H
HETATM   8  C3 Pro   0   -1.223   0.173  -0.021   1.00   0.00
C
HETATM   9  C2 Pro   0   -1.214   1.558  -0.220   1.00   0.00
C
HETATM  10  H2 Pro   0   -2.160   2.082  -0.342   1.00   0.00
H
HETATM  11  C1 Pro   0   -0.022   2.279  -0.270   1.00   0.00
C
HETATM  12  H1 Pro   0   -0.037   3.354  -0.426   1.00   0.00
H
HETATM  13  C12 Pro  0    1.192   1.612  -0.100   1.00   0.00
C
HETATM  14  H3 Pro   0    2.117   2.181  -0.131   1.00   0.00
H
HETATM  15  C4 Pro   0   -2.535  -0.604   0.045   1.00   0.00
C
HETATM  16  C5 Pro   0   -3.347  -0.475  -1.258   1.00   0.00
C
HETATM  17  C6 Pro   0   -3.378  -0.179   1.264   1.00   0.00
C
CONNECT   1    2
CONNECT   2    1    3    4
CONNECT   3    2
CONNECT   4    2    5   13
CONNECT   5    4    6    8
CONNECT   6    5    7
CONNECT   7    6
CONNECT   8    5    9   15
CONNECT   9    8   10   11
CONNECT  10    9
CONNECT  11    9   12   13
CONNECT  12   11
CONNECT  13    4   11   14
CONNECT  14   13
CONNECT  15    8   16   17
CONNECT  16   15
CONNECT  17   15
END
Itp file:
[ moleculetype ]
; Name    nrexcl
Pro      3
[ atoms ]

```

| nr | type | resnr | resid | atom | cgnr | charge | mass    | total_charge |
|----|------|-------|-------|------|------|--------|---------|--------------|
| 1  | CH3  | 1     | Pro   | C8   | 1    | 0.000  | 15.0350 | ; 0.000      |
| 2  | CH1  | 1     | Pro   | C7   | 1    | 0.00   | 13.0190 |              |
| 3  | C    | 1     | Pro   | C2   | 1    | 0.000  | 12.0110 |              |
| 4  | CH3  | 1     | Pro   | C9   | 1    | 0.000  | 15.0350 | ; 0.000      |
| 5  | C    | 1     | Pro   | C3   | 2    | -0.140 | 12.0110 |              |
| 6  | HC   | 1     | Pro   | H3   | 2    | 0.140  | 1.0080  | ; -0.000     |
| 7  | C    | 1     | Pro   | C4   | 3    | -0.140 | 12.0110 |              |
| 8  | HC   | 1     | Pro   | H4   | 3    | 0.140  | 1.0080  | ; -0.000     |
| 9  | C    | 1     | Pro   | C5   | 4    | -0.140 | 12.0110 |              |
| 10 | HC   | 1     | Pro   | H5   | 4    | 0.140  | 1.0080  | ; 0.000      |
| 11 | C    | 1     | Pro   | C6   | 5    | 0.000  | 12.0110 |              |
| 12 | CH1  | 1     | Pro   | C10  | 5    | 0.00   | 13.0190 |              |
| 13 | CH3  | 1     | Pro   | C11  | 5    | 0.000  | 15.0350 | ; 0.000      |
| 14 | C    | 1     | Pro   | C1   | 6    | 0.153  | 12.0110 |              |
| 15 | OA   | 1     | Pro   | O1   | 6    | -0.511 | 15.9994 |              |
| 16 | H    | 1     | Pro   | H13  | 6    | 0.358  | 1.0080  | ; 0.000      |
| 17 | CH3  | 1     | Pro   | C12  | 7    | 0.000  | 15.0350 | ; 0.000      |

; total charge of the molecule: 0.000

[ bonds ]

| ai | aj | funct | c0     | c1         |
|----|----|-------|--------|------------|
| 1  | 2  | 2     | 0.1530 | 7.1500e+06 |
| 2  | 3  | 2     | 0.1530 | 7.1500e+06 |
| 2  | 4  | 2     | 0.1530 | 7.1500e+06 |
| 3  | 5  | 2     | 0.1390 | 8.6600e+06 |
| 3  | 14 | 2     | 0.1390 | 8.6600e+06 |
| 5  | 6  | 2     | 0.1090 | 1.2300e+07 |
| 5  | 7  | 2     | 0.1390 | 8.6600e+06 |
| 7  | 8  | 2     | 0.1090 | 1.2300e+07 |
| 7  | 9  | 2     | 0.1390 | 8.6600e+06 |
| 9  | 10 | 2     | 0.1090 | 1.2300e+07 |
| 9  | 11 | 2     | 0.1390 | 8.6600e+06 |
| 11 | 12 | 2     | 0.1530 | 7.1500e+06 |
| 11 | 14 | 2     | 0.1390 | 8.6600e+06 |
| 12 | 13 | 2     | 0.1530 | 7.1500e+06 |
| 12 | 17 | 2     | 0.1530 | 7.1500e+06 |
| 14 | 15 | 2     | 0.1360 | 1.0200e+07 |
| 15 | 16 | 2     | 0.1000 | 1.5700e+07 |

[ pairs ]

; ai aj funct ; all 1-4 pairs but the ones excluded in GROMOS itp

|   |    |   |
|---|----|---|
| 1 | 5  | 1 |
| 1 | 14 | 1 |
| 3 | 16 | 1 |
| 4 | 5  | 1 |

|    |    |   |
|----|----|---|
| 4  | 14 | 1 |
| 9  | 13 | 1 |
| 9  | 17 | 1 |
| 11 | 16 | 1 |
| 13 | 14 | 1 |
| 14 | 17 | 1 |

[ angles ]

| ; | ai | aj | ak | funct | angle  | fc     |
|---|----|----|----|-------|--------|--------|
|   | 1  | 2  | 3  | 2     | 111.00 | 530.00 |
|   | 1  | 2  | 4  | 2     | 111.00 | 530.00 |
|   | 3  | 2  | 4  | 2     | 111.00 | 530.00 |
|   | 2  | 3  | 5  | 2     | 120.00 | 560.00 |
|   | 2  | 3  | 14 | 2     | 120.00 | 560.00 |
|   | 5  | 3  | 14 | 2     | 120.00 | 560.00 |
|   | 3  | 5  | 6  | 2     | 120.00 | 505.00 |
|   | 3  | 5  | 7  | 2     | 120.00 | 560.00 |
|   | 6  | 5  | 7  | 2     | 120.00 | 505.00 |
|   | 5  | 7  | 8  | 2     | 120.00 | 505.00 |
|   | 5  | 7  | 9  | 2     | 120.00 | 560.00 |
|   | 8  | 7  | 9  | 2     | 120.00 | 505.00 |
|   | 7  | 9  | 10 | 2     | 120.00 | 505.00 |
|   | 7  | 9  | 11 | 2     | 120.00 | 560.00 |
|   | 10 | 9  | 11 | 2     | 120.00 | 505.00 |
|   | 9  | 11 | 12 | 2     | 120.00 | 560.00 |
|   | 9  | 11 | 14 | 2     | 120.00 | 560.00 |
|   | 12 | 11 | 14 | 2     | 120.00 | 560.00 |
|   | 11 | 12 | 13 | 2     | 111.00 | 530.00 |
|   | 11 | 12 | 17 | 2     | 111.00 | 530.00 |
|   | 13 | 12 | 17 | 2     | 111.00 | 530.00 |
|   | 3  | 14 | 11 | 2     | 126.00 | 640.00 |
|   | 3  | 14 | 15 | 2     | 121.00 | 685.00 |
|   | 11 | 14 | 15 | 2     | 117.00 | 635.00 |
|   | 14 | 15 | 16 | 2     | 109.50 | 450.00 |

[ dihedrals ]

; GROMOS improper dihedrals

| ; | ai | aj | ak | al | funct | angle | fc     |
|---|----|----|----|----|-------|-------|--------|
|   | 3  | 5  | 7  | 9  | 2     | 0.00  | 167.36 |
|   | 5  | 7  | 9  | 11 | 2     | 0.00  | 167.36 |
|   | 7  | 9  | 11 | 14 | 2     | 0.00  | 167.36 |
|   | 9  | 11 | 14 | 3  | 2     | 0.00  | 167.36 |
|   | 11 | 14 | 3  | 5  | 2     | 0.00  | 167.36 |
|   | 14 | 3  | 5  | 7  | 2     | 0.00  | 167.36 |
|   | 3  | 2  | 5  | 14 | 2     | 0.00  | 167.36 |
|   | 14 | 3  | 11 | 15 | 2     | 0.00  | 167.36 |

|    |    |    |    |   |       |        |
|----|----|----|----|---|-------|--------|
| 5  | 3  | 6  | 7  | 2 | 0.00  | 167.36 |
| 7  | 5  | 8  | 9  | 2 | 0.00  | 167.36 |
| 9  | 7  | 10 | 11 | 2 | 0.00  | 167.36 |
| 11 | 9  | 12 | 14 | 2 | 0.00  | 167.36 |
| 2  | 4  | 1  | 3  | 2 | 35.26 | 334.72 |
| 12 | 11 | 17 | 13 | 2 | 35.26 | 334.72 |

[ dihedrals ]

| ; | ai | aj | ak | al | funct | ph0    | cp    | mult |
|---|----|----|----|----|-------|--------|-------|------|
|   | 1  | 2  | 3  | 14 | 1     | 180.00 | 1.00  | 6    |
|   | 14 | 11 | 12 | 17 | 1     | 180.00 | 1.00  | 6    |
|   | 3  | 14 | 15 | 16 | 1     | 180.00 | 16.70 | 2    |

[ exclusions ]

| ; | ai | aj | funct | ; | GROMOS 1-4 exclusions |
|---|----|----|-------|---|-----------------------|
|   | 2  | 6  |       |   |                       |
|   | 2  | 7  |       |   |                       |
|   | 2  | 11 |       |   |                       |
|   | 2  | 15 |       |   |                       |
|   | 3  | 8  |       |   |                       |
|   | 3  | 9  |       |   |                       |
|   | 3  | 12 |       |   |                       |
|   | 5  | 10 |       |   |                       |
|   | 5  | 11 |       |   |                       |
|   | 5  | 15 |       |   |                       |
|   | 6  | 8  |       |   |                       |
|   | 6  | 9  |       |   |                       |
|   | 6  | 14 |       |   |                       |
|   | 7  | 12 |       |   |                       |
|   | 7  | 14 |       |   |                       |
|   | 8  | 10 |       |   |                       |
|   | 8  | 11 |       |   |                       |
|   | 9  | 15 |       |   |                       |
|   | 10 | 12 |       |   |                       |
|   | 10 | 14 |       |   |                       |
|   | 12 | 15 |       |   |                       |

### 3. The pdb and itp file of hexane

#### Pdb file:

```

HEADER      UNCLASSIFIED                               05-Dec-18
TITLE       ALL ATOM STRUCTURE FOR MOLECULE DEF
AUTHOR      GROMOS AUTOMATIC TOPOLOGY BUILDER REVISION 2018-
11-06 12:13:14
AUTHOR      2  http://compbio.biosci.uq.edu.au/atb
HETATM     1  H1 Hex      0          3.311 -0.864  0.885  1.00  0.00
H

```

|        |    |         |   |        |        |        |      |      |
|--------|----|---------|---|--------|--------|--------|------|------|
| HETATM | 2  | C1 Hex  | 0 | 3.225  | -0.220 | 0.001  | 1.00 | 0.00 |
| C      |    |         |   |        |        |        |      |      |
| HETATM | 3  | H3 Hex  | 0 | 3.315  | -0.861 | -0.885 | 1.00 | 0.00 |
| H      |    |         |   |        |        |        |      |      |
| HETATM | 4  | H2 Hex  | 0 | 4.080  | 0.467  | 0.004  | 1.00 | 0.00 |
| H      |    |         |   |        |        |        |      |      |
| HETATM | 5  | C2 Hex  | 0 | 1.896  | 0.543  | -0.000 | 1.00 | 0.00 |
| C      |    |         |   |        |        |        |      |      |
| HETATM | 6  | H5 Hex  | 0 | 1.853  | 1.202  | -0.880 | 1.00 | 0.00 |
| H      |    |         |   |        |        |        |      |      |
| HETATM | 7  | H4 Hex  | 0 | 1.852  | 1.204  | 0.878  | 1.00 | 0.00 |
| H      |    |         |   |        |        |        |      |      |
| HETATM | 8  | C3 Hex  | 0 | 0.668  | -0.378 | -0.000 | 1.00 | 0.00 |
| C      |    |         |   |        |        |        |      |      |
| HETATM | 9  | H7 Hex  | 0 | 0.712  | -1.039 | -0.879 | 1.00 | 0.00 |
| H      |    |         |   |        |        |        |      |      |
| HETATM | 10 | H6 Hex  | 0 | 0.712  | -1.037 | 0.880  | 1.00 | 0.00 |
| H      |    |         |   |        |        |        |      |      |
| HETATM | 11 | C4 Hex  | 0 | -0.668 | 0.378  | -0.001 | 1.00 | 0.00 |
| C      |    |         |   |        |        |        |      |      |
| HETATM | 12 | H9 Hex  | 0 | -0.712 | 1.038  | -0.881 | 1.00 | 0.00 |
| H      |    |         |   |        |        |        |      |      |
| HETATM | 13 | H8 Hex  | 0 | -0.712 | 1.039  | 0.879  | 1.00 | 0.00 |
| H      |    |         |   |        |        |        |      |      |
| HETATM | 14 | C5 Hex  | 0 | -1.896 | -0.543 | -0.001 | 1.00 | 0.00 |
| C      |    |         |   |        |        |        |      |      |
| HETATM | 15 | H11 Hex | 0 | -1.852 | -1.202 | -0.881 | 1.00 | 0.00 |
| H      |    |         |   |        |        |        |      |      |
| HETATM | 16 | H10 Hex | 0 | -1.851 | -1.204 | 0.877  | 1.00 | 0.00 |
| H      |    |         |   |        |        |        |      |      |
| HETATM | 17 | C6 Hex  | 0 | -3.225 | 0.219  | 0.001  | 1.00 | 0.00 |
| C      |    |         |   |        |        |        |      |      |
| HETATM | 18 | H14 Hex | 0 | -4.080 | -0.468 | -0.002 | 1.00 | 0.00 |
| H      |    |         |   |        |        |        |      |      |
| HETATM | 19 | H13 Hex | 0 | -3.314 | 0.858  | 0.889  | 1.00 | 0.00 |
| H      |    |         |   |        |        |        |      |      |
| HETATM | 20 | H12 Hex | 0 | -3.313 | 0.866  | -0.881 | 1.00 | 0.00 |
| H      |    |         |   |        |        |        |      |      |
| CONECT | 1  | 2       |   |        |        |        |      |      |
| CONECT | 2  | 1       | 3 | 4      | 5      |        |      |      |
| CONECT | 3  | 2       |   |        |        |        |      |      |
| CONECT | 4  | 2       |   |        |        |        |      |      |
| CONECT | 5  | 2       | 6 | 7      | 8      |        |      |      |
| CONECT | 6  | 5       |   |        |        |        |      |      |

```

CONNECT 7 5
CONNECT 8 5 9 10 11
CONNECT 9 8
CONNECT 10 8
CONNECT 11 8 12 13 14
CONNECT 12 11
CONNECT 13 11
CONNECT 14 11 15 16 17
CONNECT 15 14
CONNECT 16 14
CONNECT 17 14 18 19 20
CONNECT 18 17
CONNECT 19 17
CONNECT 20 17

```

END

**Itp file:**

[ moleculetype ]

; Name nrexcl

Hex 3

[ atoms ]

| nr | type | resnr | resid | atom | cgmr | charge | mass    |
|----|------|-------|-------|------|------|--------|---------|
| 1  | HC   | 1     | Hex   | H1   | 1    | 0.069  | 1.0080  |
| 2  | C    | 1     | Hex   | C1   | 2    | -0.308 | 12.0110 |
| 3  | HC   | 1     | Hex   | H3   | 3    | 0.069  | 1.0080  |
| 4  | HC   | 1     | Hex   | H2   | 4    | 0.069  | 1.0080  |
| 5  | C    | 1     | Hex   | C2   | 5    | 0.219  | 12.0110 |
| 6  | HC   | 1     | Hex   | H5   | 6    | -0.037 | 1.0080  |
| 7  | HC   | 1     | Hex   | H4   | 7    | -0.037 | 1.0080  |
| 8  | C    | 1     | Hex   | C3   | 8    | -0.058 | 12.0110 |
| 9  | HC   | 1     | Hex   | H7   | 9    | 0.007  | 1.0080  |
| 10 | HC   | 1     | Hex   | H6   | 10   | 0.007  | 1.0080  |
| 11 | C    | 1     | Hex   | C4   | 11   | -0.058 | 12.0110 |
| 12 | HC   | 1     | Hex   | H9   | 12   | 0.007  | 1.0080  |
| 13 | HC   | 1     | Hex   | H8   | 13   | 0.007  | 1.0080  |
| 14 | C    | 1     | Hex   | C5   | 14   | 0.219  | 12.0110 |
| 15 | HC   | 1     | Hex   | H11  | 15   | -0.037 | 1.0080  |
| 16 | HC   | 1     | Hex   | H10  | 16   | -0.037 | 1.0080  |
| 17 | C    | 1     | Hex   | C6   | 17   | -0.308 | 12.0110 |
| 18 | HC   | 1     | Hex   | H14  | 18   | 0.069  | 1.0080  |
| 19 | HC   | 1     | Hex   | H13  | 19   | 0.069  | 1.0080  |
| 20 | HC   | 1     | Hex   | H12  | 20   | 0.069  | 1.0080  |

; total charge of the molecule: 0.000

[ bonds ]

; ai aj funct c0 c1



|    |    |   |        |            |
|----|----|---|--------|------------|
| 1  | 2  | 2 | 0.1090 | 1.2300e+07 |
| 2  | 3  | 2 | 0.1090 | 1.2300e+07 |
| 2  | 4  | 2 | 0.1090 | 1.2300e+07 |
| 2  | 5  | 2 | 0.1530 | 7.1500e+06 |
| 5  | 6  | 2 | 0.1090 | 1.2300e+07 |
| 5  | 7  | 2 | 0.1090 | 1.2300e+07 |
| 5  | 8  | 2 | 0.1530 | 7.1500e+06 |
| 8  | 9  | 2 | 0.1100 | 1.2100e+07 |
| 8  | 10 | 2 | 0.1100 | 1.2100e+07 |
| 8  | 11 | 2 | 0.1530 | 7.1500e+06 |
| 11 | 12 | 2 | 0.1100 | 1.2100e+07 |
| 11 | 13 | 2 | 0.1100 | 1.2100e+07 |
| 11 | 14 | 2 | 0.1530 | 7.1500e+06 |
| 14 | 15 | 2 | 0.1090 | 1.2300e+07 |
| 14 | 16 | 2 | 0.1090 | 1.2300e+07 |
| 14 | 17 | 2 | 0.1530 | 7.1500e+06 |
| 17 | 18 | 2 | 0.1090 | 1.2300e+07 |
| 17 | 19 | 2 | 0.1090 | 1.2300e+07 |
| 17 | 20 | 2 | 0.1090 | 1.2300e+07 |

[ pairs ]

; ai aj funct ; all 1-4 pairs but the ones excluded in GROMOS itp

|    |    |   |
|----|----|---|
| 2  | 9  | 1 |
| 2  | 10 | 1 |
| 2  | 11 | 1 |
| 5  | 12 | 1 |
| 5  | 13 | 1 |
| 5  | 14 | 1 |
| 8  | 15 | 1 |
| 8  | 16 | 1 |
| 8  | 17 | 1 |
| 11 | 18 | 1 |
| 11 | 19 | 1 |
| 11 | 20 | 1 |
| 1  | 6  | 1 |
| 1  | 7  | 1 |
| 1  | 8  | 1 |
| 4  | 6  | 1 |
| 4  | 7  | 1 |
| 4  | 8  | 1 |
| 3  | 6  | 1 |
| 3  | 7  | 1 |
| 3  | 8  | 1 |
| 7  | 9  | 1 |
| 7  | 10 | 1 |

|    |    |   |
|----|----|---|
| 7  | 11 | 1 |
| 6  | 9  | 1 |
| 6  | 10 | 1 |
| 6  | 11 | 1 |
| 10 | 12 | 1 |
| 10 | 13 | 1 |
| 10 | 14 | 1 |
| 9  | 12 | 1 |
| 9  | 13 | 1 |
| 9  | 14 | 1 |
| 13 | 15 | 1 |
| 13 | 16 | 1 |
| 13 | 17 | 1 |
| 12 | 15 | 1 |
| 12 | 16 | 1 |
| 12 | 17 | 1 |
| 16 | 18 | 1 |
| 16 | 19 | 1 |
| 16 | 20 | 1 |
| 15 | 18 | 1 |
| 15 | 19 | 1 |
| 15 | 20 | 1 |

[ angles ]

| ; | ai | aj | ak | funct | angle  | fc     |
|---|----|----|----|-------|--------|--------|
|   | 1  | 2  | 3  | 2     | 107.57 | 484.00 |
|   | 1  | 2  | 4  | 2     | 107.57 | 484.00 |
|   | 1  | 2  | 5  | 2     | 111.40 | 532.00 |
|   | 3  | 2  | 4  | 2     | 107.57 | 484.00 |
|   | 3  | 2  | 5  | 2     | 111.40 | 532.00 |
|   | 4  | 2  | 5  | 2     | 111.40 | 532.00 |
|   | 2  | 5  | 6  | 2     | 109.50 | 448.00 |
|   | 2  | 5  | 7  | 2     | 109.50 | 448.00 |
|   | 2  | 5  | 8  | 2     | 111.00 | 530.00 |
|   | 6  | 5  | 7  | 2     | 106.75 | 503.00 |
|   | 6  | 5  | 8  | 2     | 109.50 | 448.00 |
|   | 7  | 5  | 8  | 2     | 109.50 | 448.00 |
|   | 5  | 8  | 9  | 2     | 109.50 | 448.00 |
|   | 5  | 8  | 10 | 2     | 109.50 | 448.00 |
|   | 5  | 8  | 11 | 2     | 111.00 | 530.00 |
|   | 9  | 8  | 10 | 2     | 106.75 | 503.00 |
|   | 9  | 8  | 11 | 2     | 109.50 | 448.00 |
|   | 10 | 8  | 11 | 2     | 109.50 | 448.00 |
|   | 8  | 11 | 12 | 2     | 109.50 | 448.00 |
|   | 8  | 11 | 13 | 2     | 109.50 | 448.00 |

|    |    |    |   |        |        |
|----|----|----|---|--------|--------|
| 8  | 11 | 14 | 2 | 111.00 | 530.00 |
| 12 | 11 | 13 | 2 | 106.75 | 503.00 |
| 12 | 11 | 14 | 2 | 109.50 | 448.00 |
| 13 | 11 | 14 | 2 | 109.50 | 448.00 |
| 11 | 14 | 15 | 2 | 109.50 | 448.00 |
| 11 | 14 | 16 | 2 | 109.50 | 448.00 |
| 11 | 14 | 17 | 2 | 111.00 | 530.00 |
| 15 | 14 | 16 | 2 | 106.75 | 503.00 |
| 15 | 14 | 17 | 2 | 109.50 | 448.00 |
| 16 | 14 | 17 | 2 | 109.50 | 448.00 |
| 14 | 17 | 18 | 2 | 111.40 | 532.00 |
| 14 | 17 | 19 | 2 | 111.40 | 532.00 |
| 14 | 17 | 20 | 2 | 111.40 | 532.00 |
| 18 | 17 | 19 | 2 | 107.57 | 484.00 |
| 18 | 17 | 20 | 2 | 107.57 | 484.00 |
| 19 | 17 | 20 | 2 | 107.57 | 484.00 |

[ dihedrals ]

; GROMOS improper dihedrals

| ; ai | aj | ak | al | funct | angle | fc |
|------|----|----|----|-------|-------|----|
|------|----|----|----|-------|-------|----|

[ dihedrals ]

| ; ai | aj | ak | al | funct | ph0  | cp   | mult |
|------|----|----|----|-------|------|------|------|
| 1    | 2  | 5  | 8  | 1     | 0.00 | 5.92 | 3    |
| 2    | 5  | 8  | 11 | 1     | 0.00 | 5.92 | 3    |
| 5    | 8  | 11 | 14 | 1     | 0.00 | 5.92 | 3    |
| 8    | 11 | 14 | 17 | 1     | 0.00 | 5.92 | 3    |
| 11   | 14 | 17 | 20 | 1     | 0.00 | 5.92 | 3    |

[ exclusions ]

; ai aj funct ; GROMOS 1-4 exclusions

#### 4. The mdp file for molecular dynamic simulation (take the protocol guest is iodine and temperature is 50 °C as example)

```

title                = Yo
define               =
integrator           = md
dt                   = 0.002      ;2 * 50000000 = 100000000 ps (100 ns)
nsteps               = 50000000
nstxout              = 0           ; suppress .trr output
nstvout              = 0           ; suppress .trr output
nstenergy            = 5000        ; save energies every 2 ps
nstlog               = 5000        ; update log file every 2 ps
nstxtcout            = 5000        ; write .xtc trajectory every 2 ps
energygrps           = GLCA_GLCY IODI SOL
; Bond parameters
continuation         = yes         ; first dynamics run

```

```

constraint_algorithm = lincs      ; holonomic constraints
constraints          = all-bonds  ; all bonds (even heavy atom-H bonds) constrained
nstlist              = 10
cutoff-scheme        = Verlet
ns-type              = grid
rlist                = 0.9
rlistlong            = 1.4
nstcalcr             = 1
coulombtype          = Reaction-Field
rcoulomb              = 0.9
epsilon-rf            = 2.2
fourierspacing       = 0.16
vdw-type              = Cut-off
rvdw                 = 0.9
tcoupl               = V-rescale
tc-grps              = GLCA_GLCY IODI SOL
tau-t                = 0.1  0.1  0.1
ref-t                = 353  353  353
Pcoupl               = Parrinello-Rahman
pcoupltype           = isotropic
tau-p                = 1.0
ref_p                = 1.0
compressibility       = 4.5e-7
pbc                  = xyz          ; 3-D PBC
; Dispersion correction
DispCorr              = EnerPres    ; account for cut-off vdW scheme
; Velocity generation
gen_vel               = no          ; assign velocities from Maxwell distribution

```

noted: GLCA\_GLCY means acetylated amylose; IODI means iodine; SOL means water molecule.

## References

S1 Y. Liu, W. Gao, C. Zhang, P. Tang, Y. Zhao and D. Wu, *Chemical Communications*, 2017, **53**, 10680-10683.
